# Supplementary material for: Tracking the confinement effect of highly dispersive carbon in a tungsten oxide/carbon nanocomposite: conversion anode materials in lithium ion batteries
Source: Royal Society of Chemistry journal article supplement (doi:10.1039/c7ta07979f), 2017-01-01
Supplement: c7ta07979f1.pdf [file c7ta07979f1.pdf]

## Electronic Supplementary Information

### Tracking the Confinement Effect of Highly Dispersive Carbon in a Tungsten Oxide/Carbon Nanocomposite: Conversion Anode Materials in Lithium Ion Batteries

*Changshin Jo<sup>1,‡</sup>, Won-Gwang Lim<sup>1,‡</sup>, Anh Ha Dao<sup>1</sup>, Seongbeen Kim<sup>1</sup>, Seoa Kim<sup>1</sup>, Songhun Yoon<sup>2,\*</sup>, and Jinwoo Lee<sup>1,\*</sup>*

<sup>1</sup>Department of Chemical Engineering, Pohang University of Science & Technology (POSTECH), 77 Cheongam-Ro, Nam-Gu, Pohang, Gyeongbuk, 37673, Republic of Korea

<sup>2</sup>Department of Integrative Engineering, Chung-Ang University (CAU), 221, Heukseok-Dong, Dongjak-Gu, Seoul, 06974, Republic of Korea

‡ These authors contributed equally to this work

\*Corresponding author.

Tel: 82-2-820-5769; Fax: 82-2-814-2651; e-mail: [yoonsun@cau.ac.kr](mailto:yoonsun@cau.ac.kr)

Tel: 82-54-279-2395; Fax: 82-54-279-5528; e-mail: [jinwoo03@postech.ac.kr](mailto:jinwoo03@postech.ac.kr)

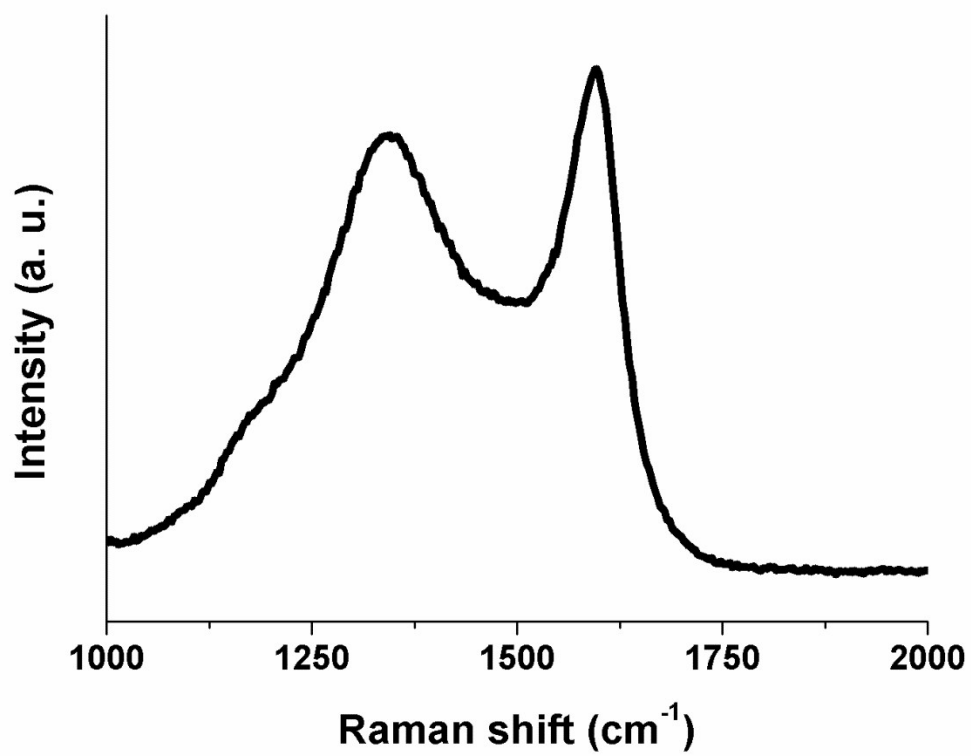

**Figure S1.** Raman spectra of m-WO<sub>x</sub>/C.

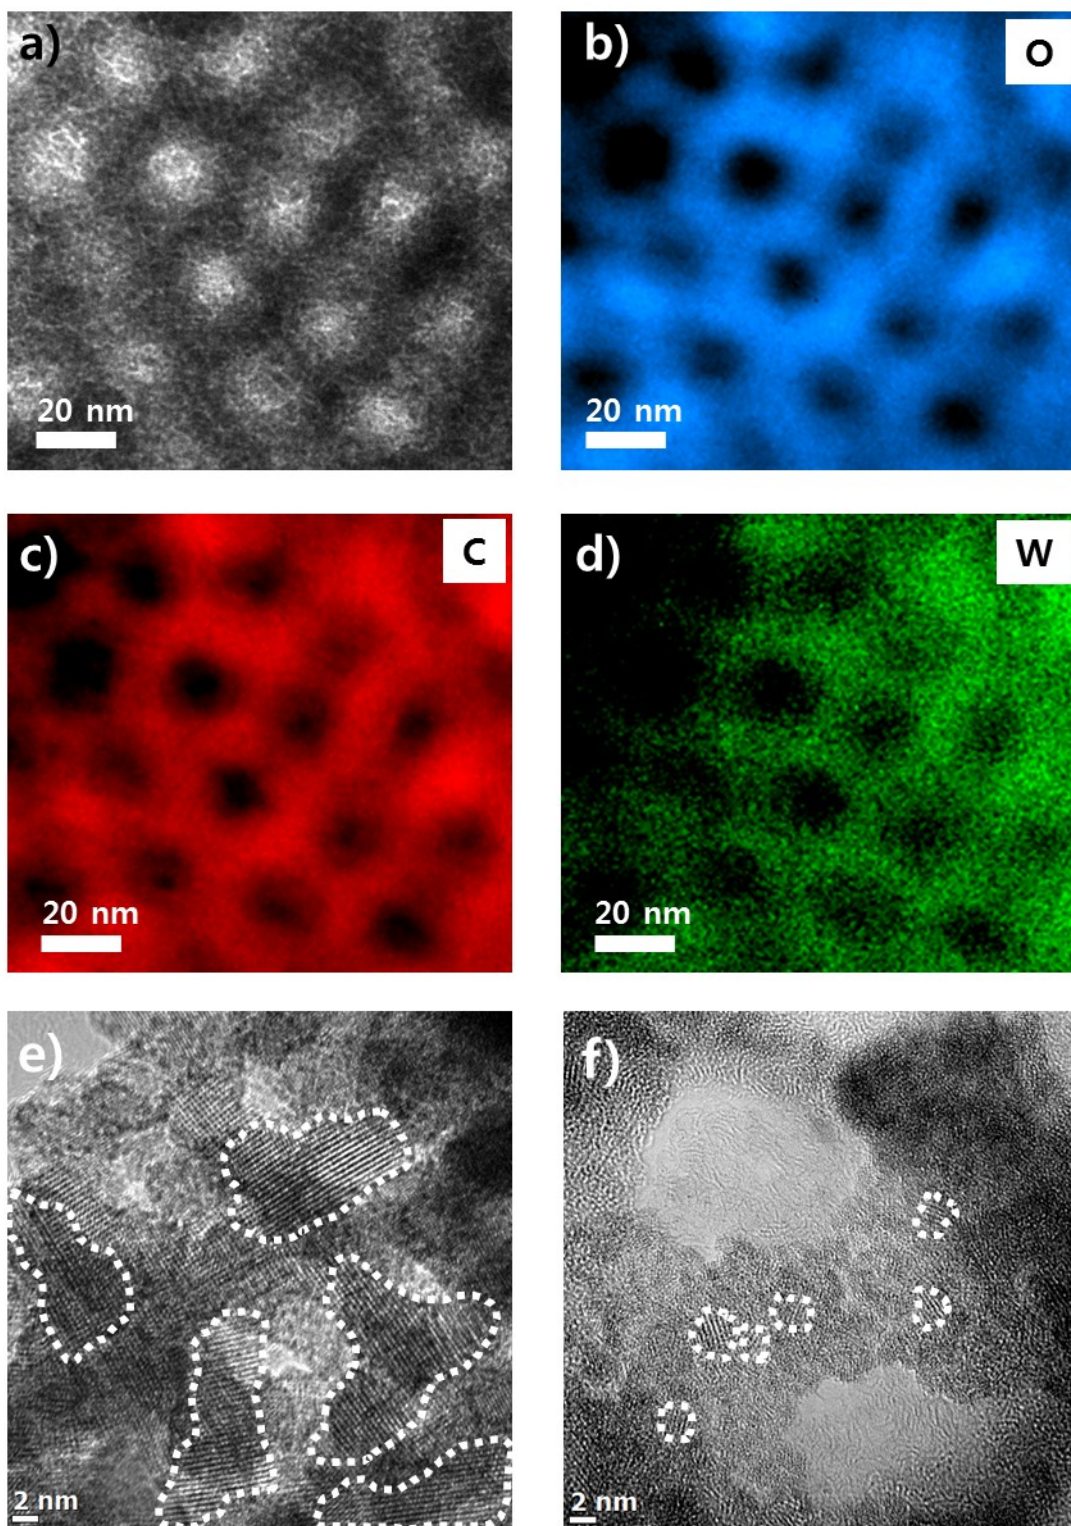

**Figure S2.** EELS mapping images of m-WO<sub>x</sub>/C (a-d), oxygen (b), carbon (c), and tungsten (d). HR-TEM images of (e) m-WO<sub>3</sub> and (f) m-WO<sub>x</sub>/C. White dotted line indicates the crystalline tungsten oxide phase in each sample.

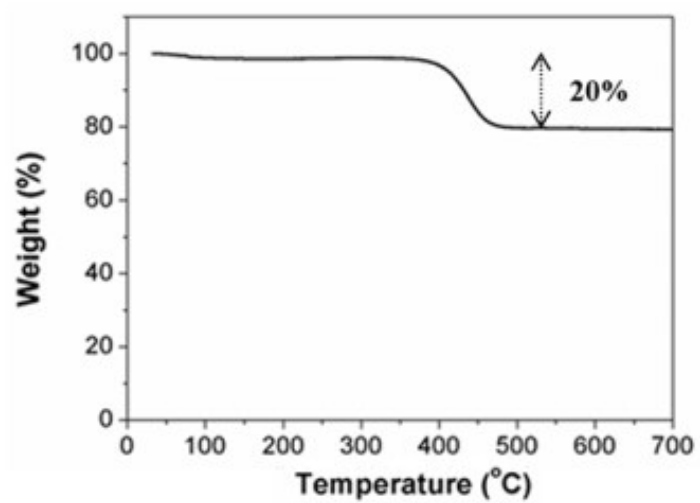

**Figure S3.** TGA data of m-WO<sub>x</sub>/C.

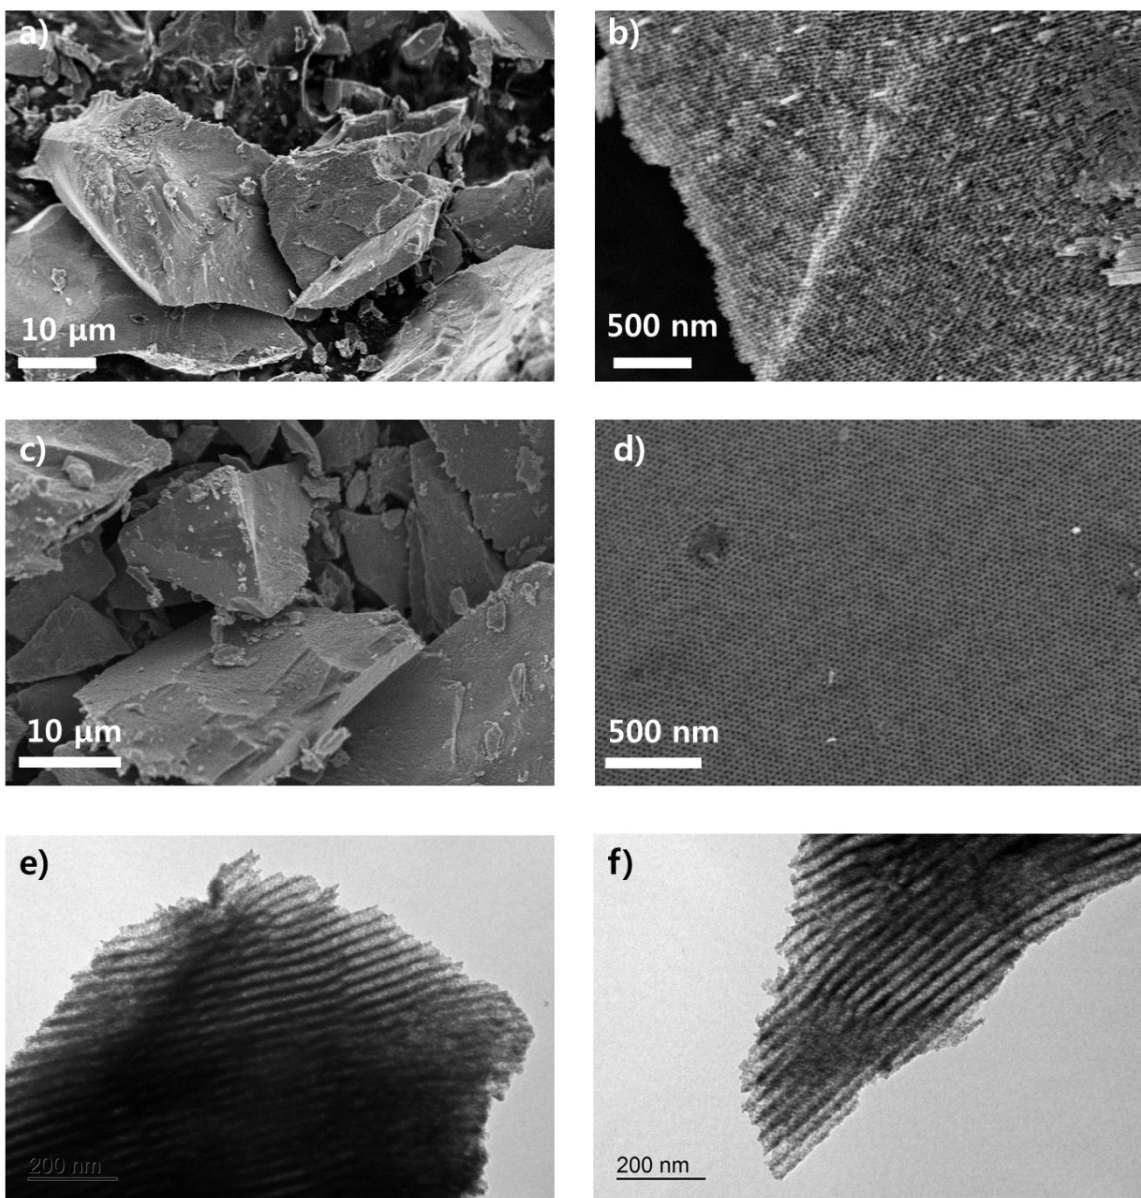

**Figure S4.** SEM images of (a, b) m-WO<sub>x</sub>/C and (c, d) m-WO<sub>3</sub> with different magnification. TEM images of (a) m-WO<sub>x</sub>/C and (b) m-WO<sub>3</sub>.

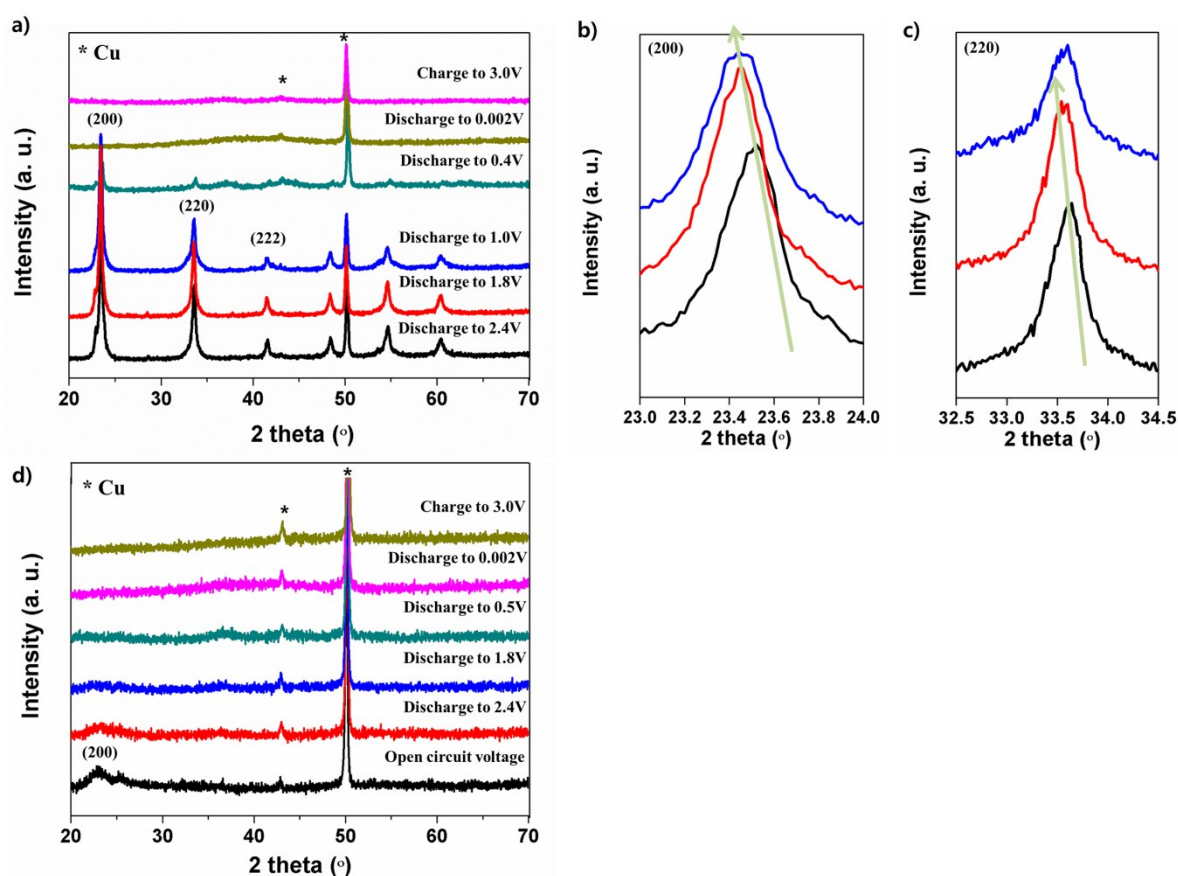

**Figure S5.** *ex-situ* XRD patterns of (a) m-WO<sub>3</sub>, (b) (200) peaks (c) (220) peaks of m-WO<sub>3</sub>, and (d) m-WO<sub>x</sub>/C.

Analysis of *ex-situ* XRD was performed at several points considering the discharge/charge graph of m-WO<sub>3</sub>. During discharge to 1.0 V, (200) and (220) peaks show similar intensities but shift to lower angle. It is due to expansion of WO<sub>3</sub> lattice by intercalation of Li<sup>+</sup>.<sup>1</sup> When discharged to 0.002 V, most of peaks are diminished and not recovered in spite of charging to 3.0 V. In relation to discharge/charge graph of m-WO<sub>3</sub> electrode, it was confirmed that conversion reaction of m-WO<sub>3</sub> occurs after plateau sloped region (0.9 to 0.002 V) and amorphous phase reacts reversibly with Li<sup>+</sup> after the first cycle.



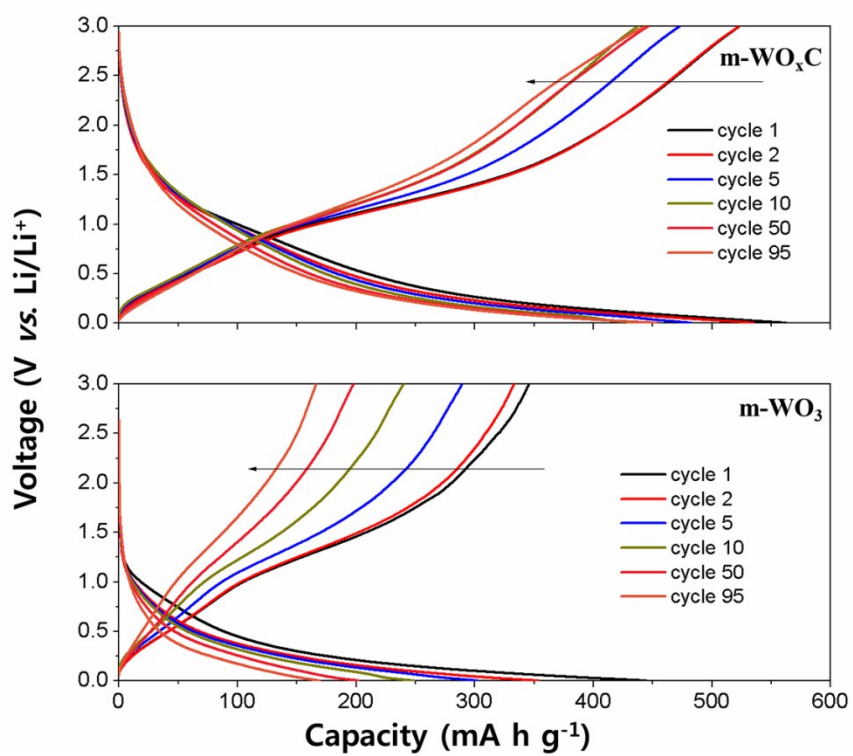

**Figure S6.** Voltage profiles of m-WO<sub>x</sub>/C and m-WO<sub>3</sub> at 250 mA g<sup>-1</sup>.

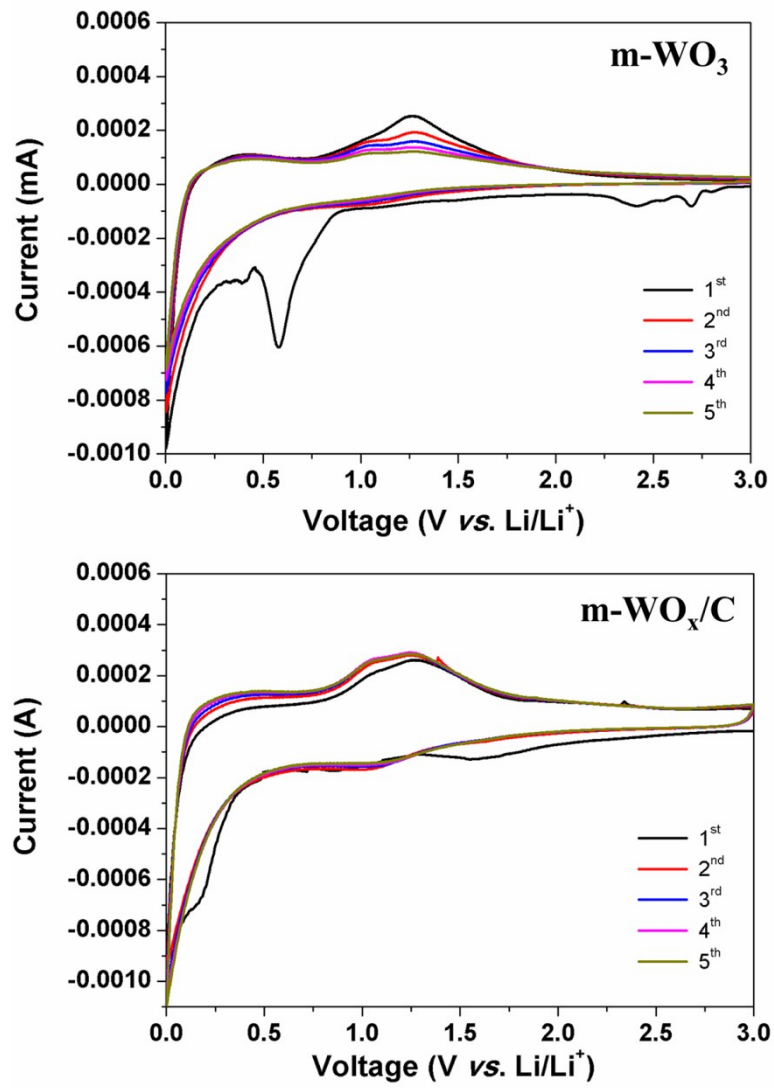

**Figure S7.** Cyclic voltammetry of (a) m-WO<sub>3</sub> and (b) m-WO<sub>x</sub>/C.



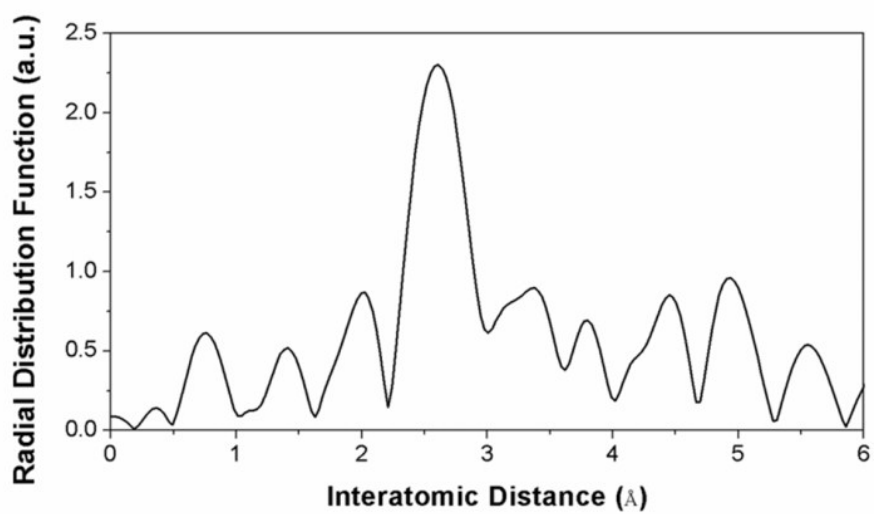

**Figure S8.** EXAFS spectra of tungsten metal.

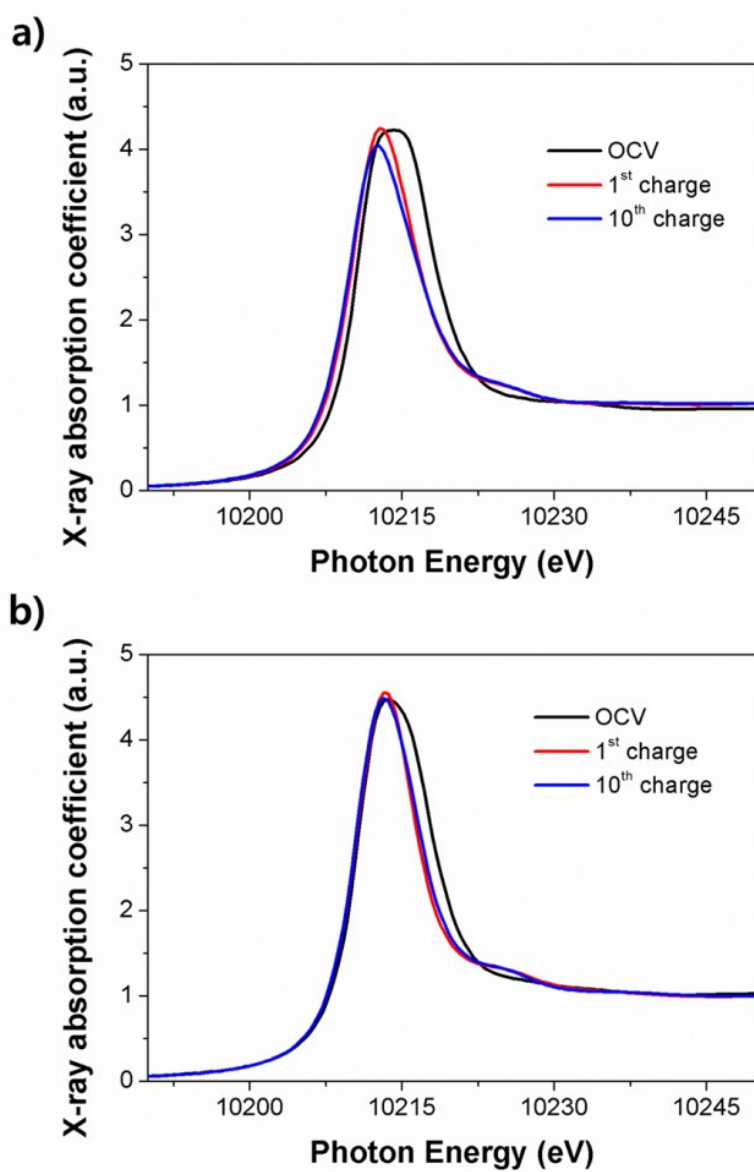

**Figure S9.** XANES spectra of (a) m-WO<sub>3</sub> and (b) m-WO<sub>x</sub>/C.

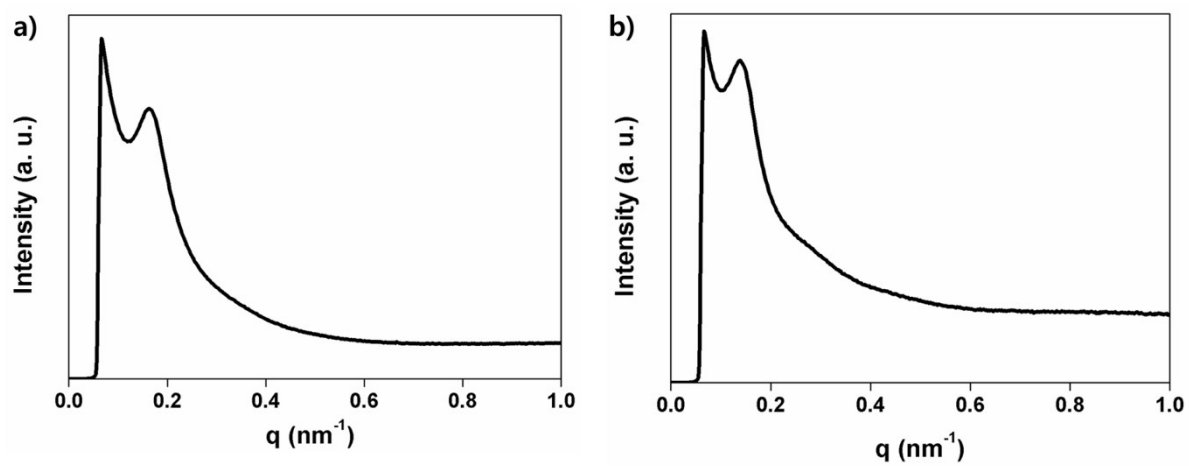

**Figure S10.** SAXS patterns of m-WO<sub>x</sub>/C (a) before galvanostatic charge/discharge cycle and (b) after 10 cycles.

## Reference

1. Kim, M. S.; Lim, E.; Kim, S.; Jo, C.; Chun, J.; Lee, J., *Adv. Funct. Mater.* 2017, **27**, 1603921.
